# Supplementary material
Source: Springer Nature journal article supplement (https://www.springermedizin.de/resource/supplementary/12889_2012_5078_MOESM1_ESM.pdf/9494522)
Supplement: MOESM1 [file 9494522]

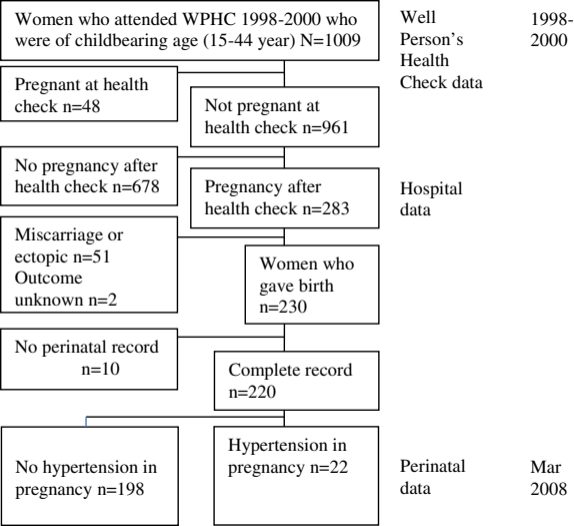

Women who attended WPHC 1998-2000 who were of childbearing age (15-44 year) N=1009

Well Person's Health Check data  
1998-2000

Pregnant at health check n=48

Not pregnant at health check n=961

No pregnancy after health check n=678

Pregnancy after health check n=283

Hospital data

Miscarriage or ectopic n=51  
Outcome unknown n=2

Women who gave birth n=230

No perinatal record n=10

Complete record n=220

No hypertension in pregnancy n=198

Hypertension in pregnancy n=22

Perinatal data  
Mar 2008
